# Supplementary material
Source: HighWire-hosted journal article supplement (https://tsaco.smart01.highwire.org/content/9/1/e001302)
Supplement: inline-supplementary-material-1 [file inline-supplementary-material-1.pdf]

**PubMed:**

("Education, Medical, Graduate"[mh] OR graduate-medical-education[tiab] OR gme[tiab] OR acgme[tiab] OR accreditation-council-for-graduate-medical-education[tiab] OR cler[tiab] OR clinical-learning-environment-review[tiab]) AND ("Military Personnel"[mh] OR military[tiab] OR air-force[tiab] OR army[tiab] OR civil-defense[tiab] OR "humanitarian intervention"[tiab:~2] OR "military research"[tiab:~2] OR "military service"[tiab:~2] OR navy[tiab] OR marine-corps\*[tiab] OR special-forces[tiab] OR soldier\*[tiab] OR sailor\*[tiab] OR serviceman[tiab] OR servicemen[tiab] OR service-man[tiab] OR service-men[tiab] OR servicewoman[tiab] OR servicewomen[tiab] OR service-woman[tiab] OR service-women[tiab] OR servicemember\*[tiab] OR service-member\*[tiab])

**Embase:**

('graduate medical education'/exp OR 'graduate medical education' OR gme OR 'accreditation council for graduate medical education'/exp OR 'accreditation council for graduate medical education' OR acgme OR cler OR 'clinical learning environment review') AND ('military personnel' OR military OR 'air force' OR 'army' OR 'civil defense' OR 'humanitarian intervention' OR 'military research' OR 'military service' OR 'navy' OR 'marine corps\*' OR 'special forces' OR soldier\* OR sailor\* OR serviceman OR servicemen OR 'service man' OR 'service men' OR servicewoman OR servicewomen OR 'service woman' OR 'service women' OR servicemember\* OR 'service member\*')

**Web of Science:**

(TS=('graduate medical education' OR gme OR 'accreditation council for graduate medical education' OR acgme OR cler OR 'clinical learning environment review'))  
AND

TS=('military personnel' OR military OR 'air force' OR 'army' OR 'civil defense' OR 'humanitarian intervention' OR 'military research' OR 'military service' OR 'navy' OR 'marine corps\*' OR 'special forces' OR soldier\* OR sailor\* OR serviceman OR servicemen OR 'service man' OR 'service men' OR servicewoman OR servicewomen OR 'service woman' OR 'service women' OR servicemember\* OR 'service member\*')

**DTIC:**

GME AND Military
